# Supplementary material
Source: Springer Nature journal article supplement (https://www.springermedizin.de/resource/supplementary/12245_2011_100_MOESM1_ESM.pdf/9672772)

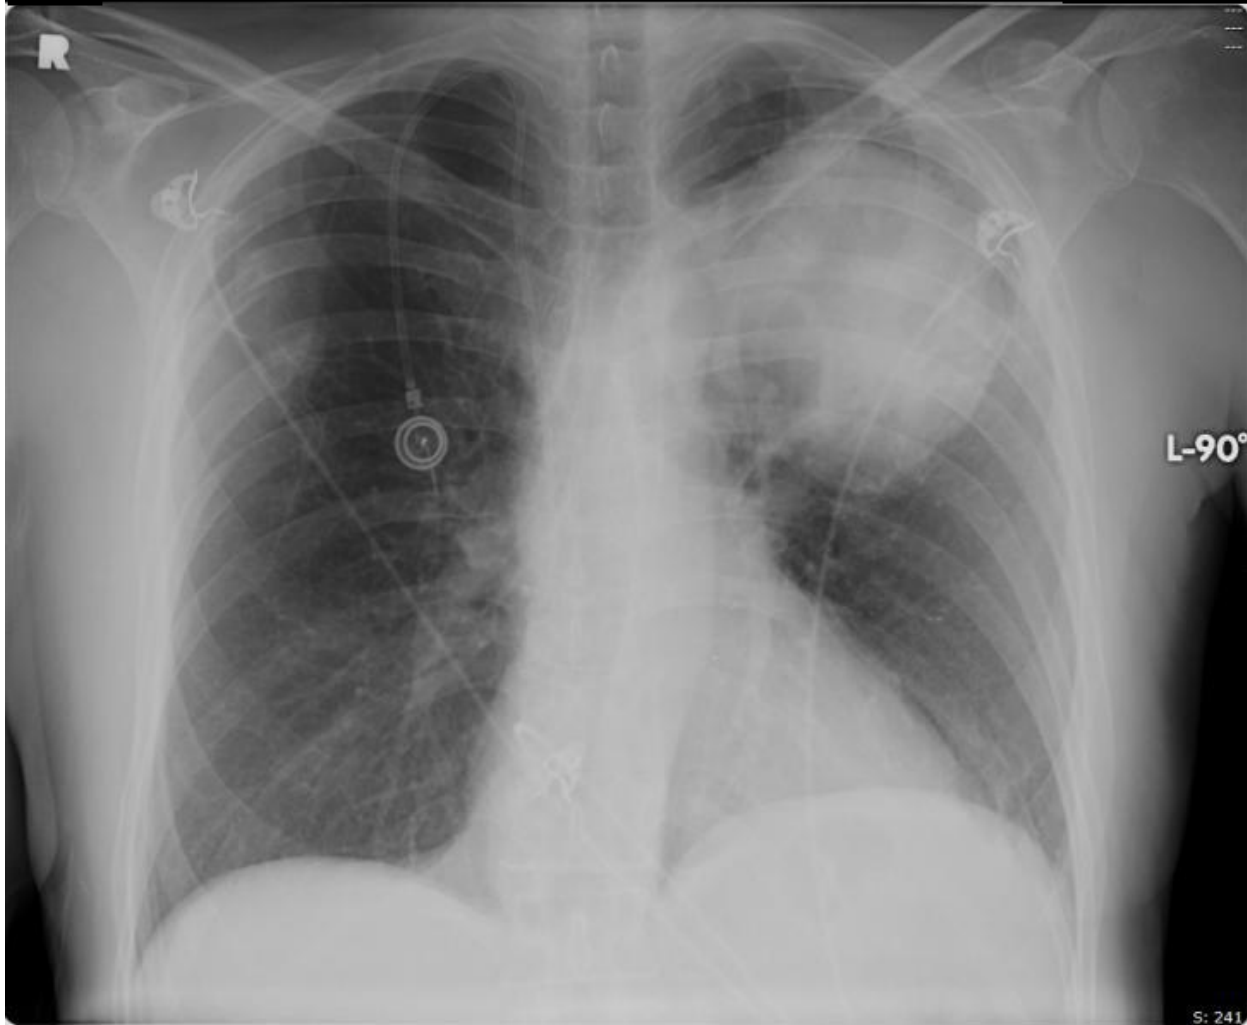

L-90°

S: 241  
Z: 0.48  
C: 512  
W: 1024  
Compressed 32:1  
IM: 1001

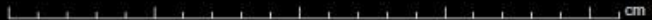

Supplement: MOESM1 [file 9672772]
